# Supplementary material for: Chemical vs. Enzymatic Refining to Produce Peanut Oil for Edible Use or to Obtain a Sustainable and Cost-Effective Protector for Stored Grains against Sitophilus zeamais (Coleoptera: Curculionidae)
Source: MDPI journal article supplement (doi:10.3390/foods11091224), 2022-04-24
Supplement: s1 [file s1]

**Supplementary File:**

**Table S1.** Major fatty acids in crude peanut oil (% wt).

| Fatty Acid | Percentage |
|------------|------------|
| Palmitic   | 12.4 ± 0.3 |
| Stearic    | 4.7 ± 0.9  |
| Oleic      | 52.3 ± 1.3 |
| Linoleic   | 23.9 ± 0.9 |
| Arachidic  | 1.2 ± 0.5  |
| Behenic    | 2.9 ± 0.7  |
| Lignoceric | 1.9 ± 0.8  |
